# Supplementary material for: Cooperation of Striatin 3 and MAP4K4 promotes growth and tissue invasion
Source: PubMed Central journal article supplement (PMC9360036; doi:10.1038/s42003-022-03708-y), 2022-08-08
Supplement: 42003_2022_3708_MOESM3_ESM.pdf [file 42003_2022_3708_MOESM3_ESM.pdf]

## Description of Additional Supplementary Files

**File name:** Supplementary information

Description: Antibodies and primers used, uncropped immunoblots

**File Name:** Supplementary data 1

Description: MAP4K4 interactomes in HEK-293T cells

**File Name:** Supplementary data 2

Description: MAP4K4 interactomes in DAOY cells

**File Name:** Supplementary data 3

Description: Log fold change (LFC) and P values for peptide phosphory

**File Name:** Supplementary data 4

Description: IFA metadata

**File name:** Supplementary data 5.xlsx

Description: Source data Figure 1

**File name:** Supplementary data 6.xlsx

Description: Source data Figure 2

**File name:** Supplementary data 7.xlsx

Description: Source data Figure 3

**File name:** Supplementary data 8.xlsx

Description: Source data Figure 4

**File name:** Supplementary data 9.xlsx

Description: Source data Figure 5

**File name:** Supplementary data 10.xlsx

Description: Source data Figure 6

**File name:** Supplementary data 11.xlsx

Description: Source data Figure S2

**File name:** Supplementary data 12.xlsx

Description: Source data Figure S3

**File name:** Supplementary data 13.xlsx

Description: Source data Figure S4

**File name:** Supplementary data 14.xlsx

Description: Source data Figure S6

**File name:** Supplementary data 15.xlsx

Description: Source data Figure S7

**File name:** Supplementary data 16.xlsx

Description: Source data Figure S8

**File name:** Supplementary data 17.xlsx

Description: Source data Figure S9
